# Supplementary material for: Comprehensive Analysis of bHLH Transcription Factors in Ipomoea aquatica and Its Response to Anthocyanin Biosynthesis
Source: MDPI journal article supplement (doi:10.3390/ijms24065652), 2023-03-15
Supplement: s1 [file s1]

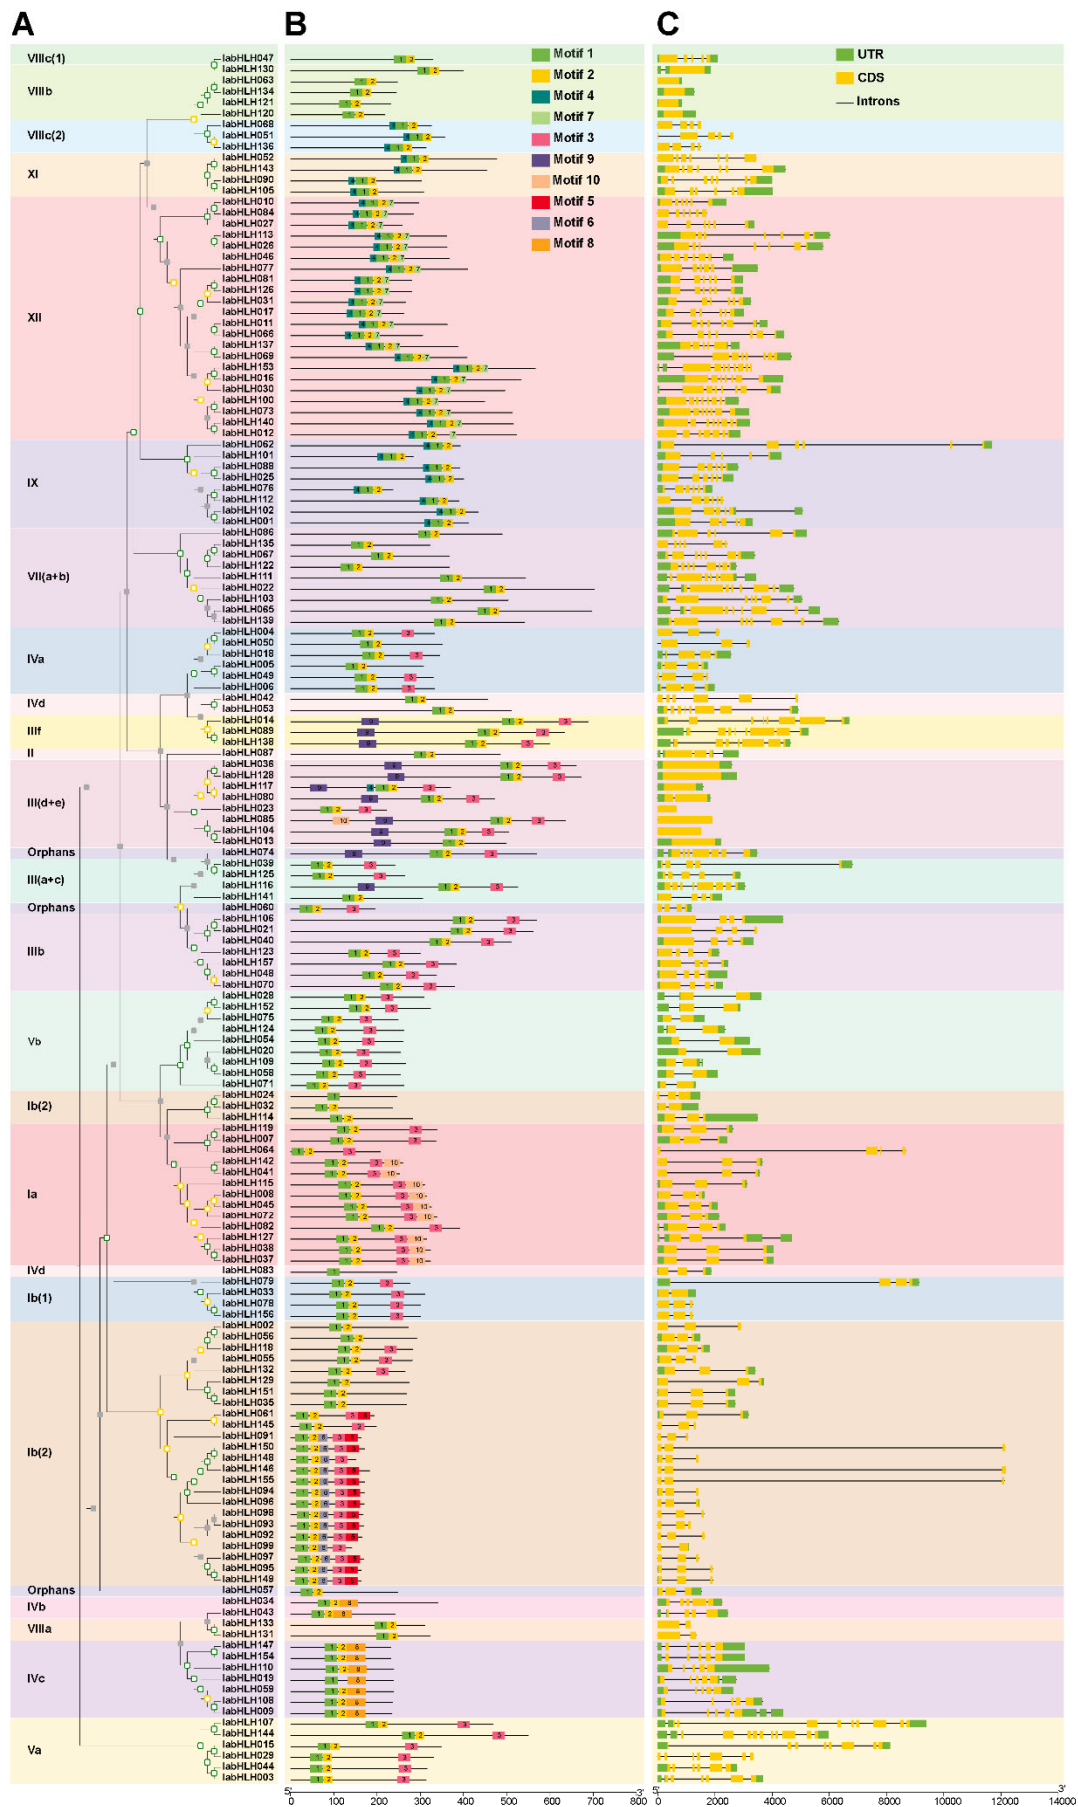

**Figure S1.** Phylogenetic tree, conserved motif, and exon-intron structure of labHLHs. (A) The phylogenetic tree containing 157 labHLH protein sequences; (B) Distribution of conserved motifs within labHLH proteins. The rectangles with different colors represent different motifs; (C) Exon-intron structure of the 157 *labHLH* genes. the green rectangles indicate exons, while the orange rectangles indicate untranslated regions (UTRs). The black solid lines among the rectangles indicate introns.
